# Supplementary material for: Thrombosis and thrombocytopenia after vaccination against and infection with SARS-CoV-2 in Catalonia, Spain
Source: PubMed Central journal article supplement (PMC9684434; doi:10.1038/s41467-022-34669-9), 2022-11-23
Supplement: 41467_2022_34669_MOESM1_ESM.pdf [file 41467_2022_34669_MOESM1_ESM.pdf]

## Supplementary Information

**Supplementary Table 1. Characteristics of study participants stratified by age category**

Characteristics of the participants in the study cohorts used for the primary analyses. Those in the general population were present in the database as of 01/01/2017. The MEDEA deprivation index is calculated at the census tract level in urban areas of Catalonia and is categorised in quintiles of deprivation. It also includes a rural category for individuals living in rural areas. \*Conditions of interest: autoimmune disease, antiphospholipid syndrome, thrombophilia, asthma, atrial fibrillation, malignant neoplastic disease, diabetes mellitus, obesity, or renal impairment. †Medications of interest: non-steroidal anti-inflammatory drugs, Cox2 inhibitors, systemic corticosteroids, hormonal contraceptives, tamoxifen, and sex hormones and modulators of the genital system.

### Participants aged 20 to 44

|                                    | <b>BNT162b2<br/>first-dose</b> | <b>BNT162b2<br/>second-dose</b> | <b>ChAdOx1<br/>first-dose</b> | <b>COVID-19 diagnosis</b> | <b>General population<br/>(index date: 1st<br/>December)</b> |
|------------------------------------|--------------------------------|---------------------------------|-------------------------------|---------------------------|--------------------------------------------------------------|
| N                                  | 463,328                        | 96,375                          | 83,458                        | 75,453                    | 1,953,084                                                    |
| Age                                | 40 [36 to 42]                  | 34 [27 to 40]                   | 35 [28 to 40]                 | 33 [26 to 39]             | 35 [28 to 40]                                                |
| Age: 20 to 29                      | 41,288 (8.9%)                  | 32,011 (33.2%)                  | 25,029 (30.0%)                | 27,629 (36.6%)            | 572,054 (29.3%)                                              |
| Age: 30 to 39                      | 183,972 (39.7%)                | 35,774 (37.1%)                  | 34,221 (41.0%)                | 29,023 (38.5%)            | 863,539 (44.2%)                                              |
| Age: 40 to 49                      | 238,068 (51.4%)                | 28,590 (29.7%)                  | 24,208 (29.0%)                | 18,801 (24.9%)            | 517,491 (26.5%)                                              |
| Sex: Male                          | 216,779 (46.8%)                | 27,869 (28.9%)                  | 27,760 (33.3%)                | 34,365 (45.5%)            | 997,902 (51.1%)                                              |
| Years of prior<br>observation time | 15.5 [15.0 to 15.5]            | 15.1 [15.1 to 15.2]             | 15.2 [15.1 to 15.2]           | 14.8 [13.1 to 15.0]       | 11.0 [11.0 to 11.0]                                          |
| <b>Comorbidities</b>               |                                |                                 |                               |                           |                                                              |
| Autoimmune disease                 | 5,229 (1.1%)                   | 1,535 (1.6%)                    | 906 (1.1%)                    | 752 (1.0%)                | 15,365 (0.8%)                                                |

|                                                    |                 |                |                |                |                 |
|----------------------------------------------------|-----------------|----------------|----------------|----------------|-----------------|
| Antiphospholipid syndrome                          | 346 (0.1%)      | 103 (0.1%)     | 66 (0.1%)      | 33 (0.0%)      | 360 (0.0%)      |
| Thrombophilia                                      | 812 (0.2%)      | 243 (0.3%)     | 152 (0.2%)     | 88 (0.1%)      | 1,170 (0.1%)    |
| Asthma                                             | 35,833 (7.7%)   | 8,670 (9.0%)   | 7,413 (8.9%)   | 6,189 (8.2%)   | 125,023 (6.4%)  |
| Atrial fibrillation                                | 792 (0.2%)      | 140 (0.1%)     | 75 (0.1%)      | 102 (0.1%)     | 2,051 (0.1%)    |
| Malignant neoplastic disease                       | 8,364 (1.8%)    | 1,751 (1.8%)   | 1,206 (1.4%)   | 1,102 (1.5%)   | 24,040 (1.2%)   |
| Diabetes mellitus                                  | 18,296 (3.9%)   | 3,429 (3.6%)   | 2,197 (2.6%)   | 2,608 (3.5%)   | 48,569 (2.5%)   |
| Obesity                                            | 61,129 (13.2%)  | 13,786 (14.3%) | 8,305 (10.0%)  | 11,096 (14.7%) | 190,526 (9.8%)  |
| Heart disease                                      | 17,169 (3.7%)   | 4,047 (4.2%)   | 2,602 (3.1%)   | 2,496 (3.3%)   | 47,673 (2.4%)   |
| Hypertensive disorder                              | 22,392 (4.8%)   | 3,868 (4.0%)   | 2,164 (2.6%)   | 2,903 (3.8%)   | 62,390 (3.2%)   |
| Renal impairment                                   | 2,282 (0.5%)    | 737 (0.8%)     | 216 (0.3%)     | 378 (0.5%)     | 6,685 (0.3%)    |
| COPD                                               | 1,723 (0.4%)    | 331 (0.3%)     | 180 (0.2%)     | 176 (0.2%)     | 5,285 (0.3%)    |
| Dementia                                           | 94 (0.0%)       | 54 (0.1%)      | 5 (0.0%)       | 11 (0.0%)      | 267 (0.0%)      |
| Medication use (183 days prior to four days prior) |                 |                |                |                |                 |
| Non-steroidal anti-inflammatory drugs              | 104,509 (22.6%) | 23,627 (24.5%) | 16,150 (19.4%) | 19,229 (25.5%) | 471,084 (24.1%) |
| Cox2 inhibitors                                    | 2,043 (0.4%)    | 434 (0.5%)     | 232 (0.3%)     | 206 (0.3%)     | 4,003 (0.2%)    |
| Systemic corticosteroids                           | 18,139 (3.9%)   | 4,325 (4.5%)   | 2,621 (3.1%)   | 2,974 (3.9%)   | 67,536 (3.5%)   |

|                                                   |                 |                |                |                |                 |
|---------------------------------------------------|-----------------|----------------|----------------|----------------|-----------------|
| Antithrombotic and anticoagulant therapies        | 5,272 (1.1%)    | 1,116 (1.2%)   | 682 (0.8%)     | 978 (1.3%)     | 15,795 (0.8%)   |
| Lipid modifying agents                            | 2,429 (0.5%)    | 401 (0.4%)     | 152 (0.2%)     | 243 (0.3%)     | 6,253 (0.3%)    |
| Antineoplastic and immunomodulating agents        | 7,211 (1.6%)    | 2,720 (2.8%)   | 1,622 (1.9%)   | 1,827 (2.4%)   | 27,194 (1.4%)   |
| Hormonal contraceptives for systemic use          | 10,205 (2.2%)   | 3,604 (3.7%)   | 2,221 (2.7%)   | 2,672 (3.5%)   | 33,797 (1.7%)   |
| Tamoxifen                                         | 70 (0.0%)       | 18 (0.0%)      | 11 (0.0%)      | 9 (0.0%)       | 251 (0.0%)      |
| Sex hormones and modulators of the genital system | 11,583 (2.5%)   | 3,998 (4.1%)   | 2,470 (3.0%)   | 2,946 (3.9%)   | 39,262 (2.0%)   |
| One or more condition of interest                 | 86,307 (18.6%)  | 19,271 (20.0%) | 12,028 (14.4%) | 14,392 (19.1%) | 263,822 (13.5%) |
| One or more medication of interest                | 116,986 (25.2%) | 27,350 (28.4%) | 18,711 (22.4%) | 21,753 (28.8%) | 512,550 (26.2%) |
| One or more condition/ medication of interest     | 173,555 (37.5%) | 39,595 (41.1%) | 27,024 (32.4%) | 30,693 (40.7%) | 676,243 (34.6%) |

## Participants aged 45 to 64

|                                    | <b>BNT162b2<br/>first-dose</b> | <b>BNT162b2<br/>second-dose</b> | <b>ChAdOx1<br/>first-dose</b> | <b>COVID-19 diagnosis</b> | <b>General population<br/>(index date: 1st<br/>December)</b> |
|------------------------------------|--------------------------------|---------------------------------|-------------------------------|---------------------------|--------------------------------------------------------------|
| N                                  | 801,005                        | 500,199                         | 321,024                       | 61,478                    | 1,550,866                                                    |
| Age                                | 52 [48 to 56]                  | 54 [51 to 57]                   | 61 [59 to 63]                 | 53 [48 to 58]             | 53 [49 to 58]                                                |
| Age: 40 to 49                      | 289,700 (36.2%)                | 77,075 (15.4%)                  | 23,937 (7.5%)                 | 19,270 (31.3%)            | 461,887 (29.8%)                                              |
| Age: 50 to 59                      | 482,366 (60.2%)                | 398,367 (79.6%)                 | 57,038 (17.8%)                | 31,446 (51.2%)            | 776,128 (50.0%)                                              |
| Age: 60 to 69                      | 28,939 (3.6%)                  | 24,757 (4.9%)                   | 240,049 (74.8%)               | 10,762 (17.5%)            | 312,851 (20.2%)                                              |
| Sex: Male                          | 398,342 (49.7%)                | 238,465 (47.7%)                 | 153,008 (47.7%)               | 29,777 (48.4%)            | 777,274 (50.1%)                                              |
| Years of prior<br>observation time | 15.4 [15.4 to 15.4]            | 15.4 [15.3 to 15.5]             | 15.3 [15.2 to 15.3]           | 14.9 [14.8 to 15.1]       | 11.0 [11.0 to 11.0]                                          |
| Comorbidities                      |                                |                                 |                               |                           |                                                              |
| Autoimmune disease                 | 14,174 (1.8%)                  | 10,141 (2.0%)                   | 8,151 (2.5%)                  | 1,389 (2.3%)              | 28,810 (1.9%)                                                |
| Antiphospholipid<br>syndrome       | 518 (0.1%)                     | 364 (0.1%)                      | 203 (0.1%)                    | 45 (0.1%)                 | 415 (0.0%)                                                   |

|                                                    |                 |                 |                 |                |                 |
|----------------------------------------------------|-----------------|-----------------|-----------------|----------------|-----------------|
| Thrombophilia                                      | 1,034 (0.1%)    | 669 (0.1%)      | 347 (0.1%)      | 103 (0.2%)     | 916 (0.1%)      |
| Asthma                                             | 48,285 (6.0%)   | 29,443 (5.9%)   | 17,946 (5.6%)   | 3,926 (6.4%)   | 72,556 (4.7%)   |
| Atrial fibrillation                                | 6,446 (0.8%)    | 4,861 (1.0%)    | 6,061 (1.9%)    | 814 (1.3%)     | 15,711 (1.0%)   |
| Malignant neoplastic disease                       | 42,501 (5.3%)   | 31,472 (6.3%)   | 31,144 (9.7%)   | 4,136 (6.7%)   | 95,540 (6.2%)   |
| Diabetes mellitus                                  | 59,778 (7.5%)   | 40,591 (8.1%)   | 41,502 (12.9%)  | 6,339 (10.3%)  | 140,088 (9.0%)  |
| Obesity                                            | 165,182 (20.6%) | 109,441 (21.9%) | 87,616 (27.3%)  | 15,824 (25.7%) | 308,574 (19.9%) |
| Heart disease                                      | 61,830 (7.7%)   | 44,040 (8.8%)   | 44,163 (13.8%)  | 6,011 (9.8%)   | 129,787 (8.4%)  |
| Hypertensive disorder                              | 148,009 (18.5%) | 107,453 (21.5%) | 107,140 (33.4%) | 13,813 (22.5%) | 360,110 (23.2%) |
| Renal impairment                                   | 12,286 (1.5%)   | 9,220 (1.8%)    | 9,815 (3.1%)    | 1,680 (2.7%)   | 29,642 (1.9%)   |
| COPD                                               | 17,477 (2.2%)   | 13,277 (2.7%)   | 15,790 (4.9%)   | 1,552 (2.5%)   | 44,823 (2.9%)   |
| Dementia                                           | 1,118 (0.1%)    | 961 (0.2%)      | 482 (0.2%)      | 148 (0.2%)     | 2,175 (0.1%)    |
| Medication use (183 days prior to four days prior) |                 |                 |                 |                |                 |
| Non-steroidal anti-inflammatory drugs              | 193,704 (24.2%) | 121,533 (24.3%) | 80,086 (24.9%)  | 17,333 (28.2%) | 423,376 (27.3%) |
| Cox2 inhibitors                                    | 7,521 (0.9%)    | 5,249 (1.0%)    | 3,847 (1.2%)    | 542 (0.9%)     | 12,001 (0.8%)   |
| Systemic corticosteroids                           | 36,728 (4.6%)   | 23,721 (4.7%)   | 16,693 (5.2%)   | 3,483 (5.7%)   | 81,102 (5.2%)   |

|                                                   |                 |                 |                 |                |                 |
|---------------------------------------------------|-----------------|-----------------|-----------------|----------------|-----------------|
| Antithrombotic and anticoagulant therapies        | 15,410 (1.9%)   | 10,190 (2.0%)   | 8,929 (2.8%)    | 1,479 (2.4%)   | 31,153 (2.0%)   |
| Lipid modifying agents                            | 16,518 (2.1%)   | 12,138 (2.4%)   | 10,385 (3.2%)   | 1,171 (1.9%)   | 35,894 (2.3%)   |
| Antineoplastic and immunomodulating agents        | 7,285 (0.9%)    | 4,800 (1.0%)    | 3,299 (1.0%)    | 655 (1.1%)     | 13,599 (0.9%)   |
| Hormonal contraceptives for systemic use          | 3,809 (0.5%)    | 1,713 (0.3%)    | 343 (0.1%)      | 296 (0.5%)     | 4,973 (0.3%)    |
| Tamoxifen                                         | 447 (0.1%)      | 310 (0.1%)      | 133 (0.0%)      | 36 (0.1%)      | 674 (0.0%)      |
| Sex hormones and modulators of the genital system | 6,125 (0.8%)    | 3,426 (0.7%)    | 1,393 (0.4%)    | 447 (0.7%)     | 8,668 (0.6%)    |
| One or more condition of interest                 | 241,118 (30.1%) | 162,284 (32.4%) | 134,534 (41.9%) | 22,865 (37.2%) | 480,938 (31.0%) |
| One or more medication of interest                | 208,119 (26.0%) | 130,613 (26.1%) | 85,991 (26.8%)  | 18,560 (30.2%) | 450,772 (29.1%) |
| One or more condition/ medication of interest     | 367,114 (45.8%) | 238,432 (47.7%) | 176,719 (55.0%) | 32,812 (53.4%) | 747,873 (48.2%) |

## Participants aged 65 or older

|                                    | <b>BNT162b2<br/>first-dose</b> | <b>BNT162b2<br/>second-dose</b> | <b>ChAdOx1 first-dose</b> | <b>COVID-19 diagnosis</b> | <b>General population<br/>(index date: 1st<br/>December)</b> |
|------------------------------------|--------------------------------|---------------------------------|---------------------------|---------------------------|--------------------------------------------------------------|
| N                                  | 757,033                        | 730,457                         | 187,926                   | 37,625                    | 1,069,544                                                    |
| Age                                | 78 [73 to 84]                  | 78 [73 to 84]                   | 67 [66 to 68]             | 77 [70 to 85]             | 75 [69 to 82]                                                |
| Age: 60 to 69                      | 40,365 (5.3%)                  | 34,378 (4.7%)                   | 187,836 (100.0%)          | 8,261 (22.0%)             | 286,680 (26.8%)                                              |
| Age: 70 to 79                      | 401,584 (53.0%)                | 389,924 (53.4%)                 | 86 (0.0%)                 | 13,797 (36.7%)            | 428,023 (40.0%)                                              |
| Age: 80 or older                   | 315,084 (41.6%)                | 306,155 (41.9%)                 | <5                        | 15,567 (41.4%)            | 354,841 (33.2%)                                              |
| Sex: Male                          | 313,787 (41.4%)                | 302,951 (41.5%)                 | 89,627 (47.7%)            | 16,581 (44.1%)            | 457,916 (42.8%)                                              |
| Years of prior<br>observation time | 15.3 [15.2 to 15.3]            | 15.3 [15.3 to 15.4]             | 15.3 [15.3 to 15.3]       | 14.9 [14.8 to 15.1]       | 11.0 [11.0 to 11.0]                                          |
| Comorbidities                      |                                |                                 |                           |                           |                                                              |
| Autoimmune disease                 | 30,852 (4.1%)                  | 29,669 (4.1%)                   | 5,428 (2.9%)              | 1,702 (4.5%)              | 34,461 (3.2%)                                                |
| Antiphospholipid<br>syndrome       | 540 (0.1%)                     | 525 (0.1%)                      | 99 (0.1%)                 | 26 (0.1%)                 | 213 (0.0%)                                                   |

|                                                    |                 |                 |                |                |                 |
|----------------------------------------------------|-----------------|-----------------|----------------|----------------|-----------------|
| Thrombophilia                                      | 1,076 (0.1%)    | 1,027 (0.1%)    | 180 (0.1%)     | 73 (0.2%)      | 622 (0.1%)      |
| Asthma                                             | 56,166 (7.4%)   | 54,183 (7.4%)   | 10,938 (5.8%)  | 3,104 (8.2%)   | 66,856 (6.3%)   |
| Atrial fibrillation                                | 104,488 (13.8%) | 100,524 (13.8%) | 7,518 (4.0%)   | 6,423 (17.1%)  | 119,497 (11.2%) |
| Malignant neoplastic disease                       | 192,806 (25.5%) | 186,567 (25.5%) | 27,729 (14.8%) | 10,170 (27.0%) | 219,053 (20.5%) |
| Diabetes mellitus                                  | 208,372 (27.5%) | 201,300 (27.6%) | 36,797 (19.6%) | 11,856 (31.5%) | 275,512 (25.8%) |
| Obesity                                            | 293,724 (38.8%) | 284,056 (38.9%) | 64,993 (34.6%) | 15,616 (41.5%) | 352,441 (33.0%) |
| Heart disease                                      | 329,182 (43.5%) | 318,215 (43.6%) | 40,652 (21.6%) | 17,686 (47.0%) | 388,899 (36.4%) |
| Hypertensive disorder                              | 538,892 (71.2%) | 521,136 (71.3%) | 91,685 (48.8%) | 26,838 (71.3%) | 716,377 (67.0%) |
| Renal impairment                                   | 180,986 (23.9%) | 174,741 (23.9%) | 11,337 (6.0%)  | 10,829 (28.8%) | 192,676 (18.0%) |
| COPD                                               | 90,561 (12.0%)  | 87,091 (11.9%)  | 14,311 (7.6%)  | 5,537 (14.7%)  | 115,592 (10.8%) |
| Dementia                                           | 54,058 (7.1%)   | 51,778 (7.1%)   | 711 (0.4%)     | 5,136 (13.7%)  | 69,729 (6.5%)   |
| Medication use (183 days prior to four days prior) |                 |                 |                |                |                 |
| Non-steroidal anti-inflammatory drugs              | 217,518 (28.7%) | 210,762 (28.9%) | 50,996 (27.1%) | 12,325 (32.8%) | 365,538 (34.2%) |
| Cox2 inhibitors                                    | 7,800 (1.0%)    | 7,659 (1.0%)    | 2,407 (1.3%)   | 351 (0.9%)     | 10,818 (1.0%)   |



|                                                   |                 |                 |                 |                |                 |
|---------------------------------------------------|-----------------|-----------------|-----------------|----------------|-----------------|
| Systemic corticosteroids                          | 73,841 (9.8%)   | 71,755 (9.8%)   | 12,862 (6.8%)   | 4,163 (11.1%)  | 106,964 (10.0%) |
| Antithrombotic and anticoagulant therapies        | 49,912 (6.6%)   | 47,079 (6.4%)   | 7,353 (3.9%)    | 3,428 (9.1%)   | 63,349 (5.9%)   |
| Lipid modifying agents                            | 27,228 (3.6%)   | 26,445 (3.6%)   | 7,802 (4.2%)    | 1,322 (3.5%)   | 38,379 (3.6%)   |
| Antineoplastic and immunomodulating agents        | 11,469 (1.5%)   | 11,135 (1.5%)   | 2,090 (1.1%)    | 619 (1.6%)     | 15,733 (1.5%)   |
| Hormonal contraceptives for systemic use          | 945 (0.1%)      | 873 (0.1%)      | 31 (0.0%)       | 119 (0.3%)     | 1,718 (0.2%)    |
| Tamoxifen                                         | 196 (0.0%)      | 197 (0.0%)      | 43 (0.0%)       | 11 (0.0%)      | 282 (0.0%)      |
| Sex hormones and modulators of the genital system | 2,790 (0.4%)    | 2,684 (0.4%)    | 612 (0.3%)      | 199 (0.5%)     | 3,870 (0.4%)    |
| One or more condition of interest                 | 553,175 (73.1%) | 534,669 (73.2%) | 102,943 (54.8%) | 28,692 (76.3%) | 704,720 (65.9%) |
| One or more medication of interest                | 242,064 (32.0%) | 234,766 (32.1%) | 55,068 (29.3%)  | 13,639 (36.2%) | 397,835 (37.2%) |
| One or more condition/ medication of interest     | 608,146 (80.3%) | 588,107 (80.5%) | 123,975 (66.0%) | 31,290 (83.2%) | 820,101 (76.7%) |

**Supplementary Table 2. Observed versus expected events among people vaccinated against SARS-CoV-2 or with a diagnosis of COVID-19, without requiring year of prior history**

For each event of interest, the number of people contributing to the analysis from the target population, their person-years contributed, and the number of observed events are given. Expected events are estimated using indirect standardization to the general population. Standardized incidence ratios (SIRs) with 95% confidence intervals (CIs) were estimated. Events with fewer than 5 occurrences were omitted.

|                                | <b>N</b>  | <b>Person-years</b> | <b>Observed events</b> | <b>Expected events</b> | <b>SIR (95% CI)</b> |
|--------------------------------|-----------|---------------------|------------------------|------------------------|---------------------|
| <b>Deep vein thrombosis</b>    |           |                     |                        |                        |                     |
| ChAdOx1 first-dose             | 592,808   | 34,054              | 39                     | 43.9                   | 0.89 (0.65 to 1.22) |
| BNT162b2 first-dose            | 2,030,008 | 100,883             | 184                    | 177                    | 1.04 (0.90 to 1.20) |
| BNT162b2 second-dose           | 1,329,708 | 78,566              | 130                    | 163                    | 0.80 (0.67 to 0.95) |
| <b>Immune thrombocytopenia</b> |           |                     |                        |                        |                     |
| ChAdOx1 first-dose             | 593,128   | 34,073              | 12                     | 24.9                   | 0.48 (0.27 to 0.85) |
| BNT162b2 first-dose            | 2,031,429 | 100,963             | 97                     | 94.5                   | 1.03 (0.84 to 1.25) |
| BNT162b2 second-dose           | 1,330,920 | 78,639              | 61                     | 89.1                   | 0.68 (0.53 to 0.88) |
| <b>Ischemic stroke</b>         |           |                     |                        |                        |                     |
| ChAdOx1 first-dose             | 592,072   | 34,010              | 107                    | 96                     | 1.11 (0.92 to 1.35) |
| BNT162b2 first-dose            | 2,024,431 | 100,557             | 525                    | 532.9                  | 0.99 (0.90 to 1.07) |
| BNT162b2 second-dose           | 1,324,691 | 78,260              | 516                    | 513.1                  | 1.01 (0.92 to 1.10) |
| <b>Myocardial infarction</b>   |           |                     |                        |                        |                     |

|                                                                       |           |         |     |       |                     |
|-----------------------------------------------------------------------|-----------|---------|-----|-------|---------------------|
| ChAdOx1 first-dose                                                    | 592,221   | 34,019  | 72  | 76.5  | 0.94 (0.75 to 1.19) |
| BNT162b2 first-dose                                                   | 2,028,962 | 100,822 | 281 | 268.1 | 1.05 (0.93 to 1.18) |
| BNT162b2 second-dose                                                  | 1,328,821 | 78,509  | 272 | 247.9 | 1.10 (0.97 to 1.24) |
| <b>Myocardial infarction or ischemic stroke</b>                       |           |         |     |       |                     |
| ChAdOx1 first-dose                                                    | 590,888   | 33,940  | 179 | 169   | 1.06 (0.91 to 1.23) |
| BNT162b2 first-dose                                                   | 2,020,172 | 100,314 | 796 | 784   | 1.02 (0.95 to 1.09) |
| BNT162b2 second-dose                                                  | 1,321,026 | 78,037  | 775 | 744.6 | 1.04 (0.97 to 1.12) |
| <b>Myocardial infarction or ischemic stroke with thrombocytopenia</b> |           |         |     |       |                     |
| ChAdOx1 first-dose                                                    | 593,223   | 34,078  | 9   | 11.7  | 0.77 (0.40 to 1.48) |
| BNT162b2 first-dose                                                   | 2,032,104 | 101,001 | 53  | 62.2  | 0.85 (0.65 to 1.12) |
| BNT162b2 second-dose                                                  | 1,331,472 | 78,671  | 59  | 60    | 0.98 (0.76 to 1.27) |
| <b>Pulmonary embolism</b>                                             |           |         |     |       |                     |
| ChAdOx1 first-dose                                                    | 592,968   | 34,063  | 24  | 30.8  | 0.78 (0.52 to 1.16) |
| BNT162b2 first-dose                                                   | 2,030,489 | 100,909 | 154 | 123.7 | 1.25 (1.06 to 1.46) |
| BNT162b2 second-dose                                                  | 1,330,172 | 78,593  | 117 | 116.2 | 1.01 (0.84 to 1.21) |
| <b>Stroke</b>                                                         |           |         |     |       |                     |

|                                                     |           |         |       |          |                     |
|-----------------------------------------------------|-----------|---------|-------|----------|---------------------|
| ChAdOx1 first-dose                                  | 591,940   | 34,002  | 111   | 112.3    | 0.99 (0.82 to 1.19) |
| BNT162b2 first-dose                                 | 2,023,548 | 100,506 | 583   | 620.7    | 0.94 (0.87 to 1.02) |
| BNT162b2 second-dose                                | 1,323,945 | 78,214  | 588   | 595.9    | 0.99 (0.91 to 1.07) |
| <b>Stroke with thrombocytopenia</b>                 |           |         |       |          |                     |
| BNT162b2 first-dose                                 | 2,032,387 | 101,017 | 39    | 46.5     | 0.84 (0.61 to 1.15) |
| BNT162b2 second-dose                                | 1,331,736 | 78,687  | 41    | 45       | 0.91 (0.67 to 1.24) |
| <b>Thrombocytopenia</b>                             |           |         |       |          |                     |
| ChAdOx1 first-dose                                  | 579,728   | 33,281  | 756   | 589.9    | 1.28 (1.19 to 1.38) |
| BNT162b2 first-dose                                 | 1,964,102 | 97,139  | 3,198 | 2,152.70 | 1.49 (1.43 to 1.54) |
| BNT162b2 second-dose                                | 1,270,019 | 74,987  | 2,760 | 1,968.70 | 1.40 (1.35 to 1.46) |
| <b>Venous thromboembolism</b>                       |           |         |       |          |                     |
| ChAdOx1 first-dose                                  | 592,514   | 34,037  | 60    | 65.6     | 0.91 (0.71 to 1.18) |
| BNT162b2 first-dose                                 | 2,028,012 | 100,768 | 315   | 265.5    | 1.19 (1.06 to 1.32) |
| BNT162b2 second-dose                                | 1,328,020 | 78,463  | 228   | 246.8    | 0.92 (0.81 to 1.05) |
| <b>Venous thromboembolism with thrombocytopenia</b> |           |         |       |          |                     |
| ChAdOx1 first-dose                                  | 593,305   | 34,083  | 8     | 6.2      | 1.28 (0.64 to 2.56) |

|                      |           |         |    |      |                     |
|----------------------|-----------|---------|----|------|---------------------|
| BNT162b2 first-dose  | 2,032,684 | 101,034 | 27 | 21.7 | 1.24 (0.85 to 1.81) |
| BNT162b2 second-dose | 1,332,016 | 78,704  | 20 | 20.4 | 0.98 (0.63 to 1.52) |

**Supplementary Table 3. Observed versus expected events among people vaccinated against SARS-CoV-2 or with a diagnosis of COVID-19, stratified by calendar time**

For each event of interest, the number of people contributing to the analysis from the target population, their person-years contributed, and the number of observed events are given. Expected events are estimated using indirect standardization to the general population. Standardized incidence ratios (SIRs) with 95% confidence intervals (CIs) were estimated. Events with fewer than 5 occurrences were omitted.

|                                | <b>Study period</b> | <b>N</b>  | <b>Person-years</b> | <b>Observed events</b> | <b>Expected events</b> | <b>SIR (95% CI)</b> |
|--------------------------------|---------------------|-----------|---------------------|------------------------|------------------------|---------------------|
| <b>Deep vein thrombosis</b>    |                     |           |                     |                        |                        |                     |
| ChAdOx1 first-dose             | From March          | 523,617   | 30,078              | 37                     | 41.9                   | 0.88 (0.64 to 1.22) |
| BNT162b2 first-dose            | Before March        | 255,401   | 14,654              | 36                     | 26                     | 1.38 (1.00 to 1.92) |
| BNT162b2 first-dose            | From March          | 1,762,585 | 85,726              | 146                    | 150.4                  | 0.97 (0.83 to 1.14) |
| BNT162b2 second-dose           | Before March        | 134,172   | 8,080               | 7                      | 10.7                   | 0.65 (0.31 to 1.37) |
| BNT162b2 second-dose           | From March          | 1,190,254 | 70,172              | 123                    | 151.8                  | 0.81 (0.68 to 0.97) |
| <b>Immune thrombocytopenia</b> |                     |           |                     |                        |                        |                     |
| ChAdOx1 first-dose             | From March          | 523,915   | 30,096              | 12                     | 24.1                   | 0.50 (0.28 to 0.88) |
| BNT162b2 first-dose            | Before March        | 255,509   | 14,661              | 28                     | 13.2                   | 2.13 (1.47 to 3.08) |
| BNT162b2 first-dose            | From March          | 1,763,886 | 85,799              | 69                     | 81.1                   | 0.85 (0.67 to 1.08) |
| BNT162b2 second-dose           | From March          | 134,201   | 8,082               | 7                      | 5.3                    | 1.31 (0.62 to 2.75) |
| <b>Ischemic stroke</b>         |                     |           |                     |                        |                        |                     |

|                                                 |              |           |        |     |       |                     |
|-------------------------------------------------|--------------|-----------|--------|-----|-------|---------------------|
| ChAdOx1 first-dose                              | Before March | 67,000    | 3,851  | 5   | 9     | 0.56 (0.23 to 1.34) |
| ChAdOx1 first-dose                              | From March   | 522,870   | 30,034 | 101 | 93.2  | 1.08 (0.89 to 1.32) |
| BNT162b2 first-dose                             | Before March | 253,789   | 14,560 | 112 | 84.7  | 1.32 (1.10 to 1.59) |
| BNT162b2 first-dose                             | From March   | 1,758,645 | 85,495 | 409 | 445.8 | 0.92 (0.83 to 1.01) |
| BNT162b2 second-dose                            | Before March | 133,432   | 8,036  | 31  | 31.5  | 0.98 (0.69 to 1.40) |
| BNT162b2 second-dose                            | From March   | 1,185,997 | 69,912 | 484 | 479.5 | 1.01 (0.92 to 1.10) |
| <b>Myocardial infarction</b>                    |              |           |        |     |       |                     |
| ChAdOx1 first-dose                              | From March   | 523,018   | 30,043 | 71  | 73.3  | 0.97 (0.77 to 1.22) |
| BNT162b2 first-dose                             | Before March | 255,458   | 14,658 | 41  | 38.8  | 1.06 (0.78 to 1.44) |
| BNT162b2 first-dose                             | From March   | 1,761,492 | 85,663 | 239 | 228.5 | 1.05 (0.92 to 1.19) |
| BNT162b2 second-dose                            | Before March | 134,279   | 8,086  | 18  | 16.2  | 1.11 (0.70 to 1.77) |
| BNT162b2 second-dose                            | From March   | 1,189,264 | 70,111 | 254 | 231.1 | 1.10 (0.97 to 1.24) |
| <b>Myocardial infarction or ischemic stroke</b> |              |           |        |     |       |                     |
| ChAdOx1 first-dose                              | Before March | 66,990    | 3,850  | 6   | 14    | 0.43 (0.19 to 0.95) |
| ChAdOx1 first-dose                              | From March   | 521,699   | 29,965 | 172 | 163.1 | 1.05 (0.91 to 1.22) |
| BNT162b2 first-dose                             | Before March | 253,263   | 14,529 | 150 | 120.7 | 1.24 (1.06 to 1.46) |
| BNT162b2 first-dose                             | From March   | 1,754,933 | 85,285 | 643 | 660   | 0.97 (0.90 to 1.05) |

|                                                                       |              |           |        |     |       |                     |
|-----------------------------------------------------------------------|--------------|-----------|--------|-----|-------|---------------------|
| BNT162b2 second-dose                                                  | Before March | 133,302   | 8,028  | 46  | 46.6  | 0.99 (0.74 to 1.32) |
| BNT162b2 second-dose                                                  | From March   | 1,182,475 | 69,698 | 728 | 695.3 | 1.05 (0.97 to 1.13) |
| <b>Myocardial infarction or ischemic stroke with thrombocytopenia</b> |              |           |        |     |       |                     |
| ChAdOx1 first-dose                                                    | From March   | 524,007   | 30,101 | 8   | 11.4  | 0.70 (0.35 to 1.40) |
| BNT162b2 first-dose                                                   | Before March | 255,692   | 14,672 | 17  | 9.7   | 1.75 (1.09 to 2.82) |
| BNT162b2 first-dose                                                   | From March   | 1,764,382 | 85,826 | 36  | 52.3  | 0.69 (0.50 to 0.95) |
| BNT162b2 second-dose                                                  | From March   | 1,191,875 | 70,269 | 56  | 56.2  | 1.00 (0.77 to 1.29) |
| <b>Pulmonary embolism</b>                                             |              |           |        |     |       |                     |
| ChAdOx1 first-dose                                                    | From March   | 523,765   | 30,087 | 22  | 29.7  | 0.74 (0.49 to 1.12) |
| BNT162b2 first-dose                                                   | Before March | 255,440   | 14,657 | 31  | 18    | 1.72 (1.21 to 2.45) |
| BNT162b2 first-dose                                                   | From March   | 1,763,026 | 85,750 | 123 | 105.2 | 1.17 (0.98 to 1.40) |
| BNT162b2 second-dose                                                  | Before March | 134,183   | 8,081  | 9   | 7.2   | 1.25 (0.65 to 2.40) |
| BNT162b2 second-dose                                                  | From March   | 1,190,707 | 70,199 | 107 | 108.5 | 0.99 (0.82 to 1.19) |
| <b>Stroke</b>                                                         |              |           |        |     |       |                     |
| ChAdOx1 first-dose                                                    | Before March | 66,996    | 3,850  | 5   | 10.7  | 0.47 (0.19 to 1.12) |
| ChAdOx1 first-dose                                                    | From March   | 522,745   | 30,026 | 105 | 108.8 | 0.97 (0.80 to 1.17) |



|                                     |              |           |        |       |          |                     |
|-------------------------------------|--------------|-----------|--------|-------|----------|---------------------|
| BNT162b2 first-dose                 | Before March | 253,562   | 14,547 | 127   | 98.4     | 1.29 (1.08 to 1.54) |
| BNT162b2 first-dose                 | From March   | 1,757,992 | 85,458 | 450   | 519.5    | 0.87 (0.79 to 0.95) |
| BNT162b2 second-dose                | Before March | 133,361   | 8,032  | 36    | 36.8     | 0.98 (0.71 to 1.36) |
| BNT162b2 second-dose                | From March   | 1,185,324 | 69,871 | 551   | 556.7    | 0.99 (0.91 to 1.08) |
| <b>Stroke with thrombocytopenia</b> |              |           |        |       |          |                     |
| BNT162b2 first-dose                 | Before March | 255,749   | 14,675 | 13    | 7.5      | 1.74 (1.01 to 2.99) |
| BNT162b2 first-dose                 | From March   | 1,764,605 | 85,839 | 26    | 38.9     | 0.67 (0.46 to 0.98) |
| BNT162b2 second-dose                | From March   | 1,192,127 | 70,285 | 39    | 42       | 0.93 (0.68 to 1.27) |
| <b>Thrombocytopenia</b>             |              |           |        |       |          |                     |
| ChAdOx1 first-dose                  | Before March | 66,560    | 3,825  | 29    | 50.2     | 0.58 (0.40 to 0.83) |
| ChAdOx1 first-dose                  | From March   | 510,974   | 29,331 | 725   | 559.4    | 1.30 (1.21 to 1.39) |
| BNT162b2 first-dose                 | Before March | 242,978   | 13,927 | 612   | 315.7    | 1.94 (1.79 to 2.10) |
| BNT162b2 first-dose                 | From March   | 1,709,196 | 82,714 | 2,574 | 1,829.70 | 1.41 (1.35 to 1.46) |
| BNT162b2 second-dose                | Before March | 129,268   | 7,783  | 244   | 134.8    | 1.81 (1.60 to 2.05) |
| BNT162b2 second-dose                | From March   | 1,135,530 | 66,895 | 2,505 | 1,828.50 | 1.37 (1.32 to 1.42) |
| <b>Venous thromboembolism</b>       |              |           |        |       |          |                     |
| ChAdOx1 first-dose                  | From March   | 523,332   | 30,061 | 56    | 62.9     | 0.89 (0.69 to 1.16) |

|                                                     |              |           |        |     |       |                     |
|-----------------------------------------------------|--------------|-----------|--------|-----|-------|---------------------|
| BNT162b2 first-dose                                 | Before March | 254,999   | 14,631 | 63  | 39.1  | 1.61 (1.26 to 2.06) |
| BNT162b2 first-dose                                 | From March   | 1,761,000 | 85,636 | 250 | 225.5 | 1.11 (0.98 to 1.25) |
| BNT162b2 second-dose                                | Before March | 134,008   | 8,070  | 14  | 15.9  | 0.88 (0.52 to 1.48) |
| BNT162b2 second-dose                                | From March   | 1,188,739 | 70,081 | 213 | 230.2 | 0.93 (0.81 to 1.06) |
| <b>Venous thromboembolism with thrombocytopenia</b> |              |           |        |     |       |                     |
| ChAdOx1 first-dose                                  | From March   | 524,089   | 30,106 | 7   | 6.1   | 1.15 (0.55 to 2.41) |
| BNT162b2 first-dose                                 | From March   | 1,764,790 | 85,849 | 23  | 18.6  | 1.24 (0.82 to 1.86) |
| BNT162b2 second-dose                                | From March   | 1,192,373 | 70,300 | 19  | 19.1  | 0.99 (0.63 to 1.56) |

**Supplementary Table 4. Observed versus expected events among people vaccinated against SARS-CoV-2 or with a diagnosis of COVID-19, excluding vaccinated persons with a history of COVID-19**

For each event of interest, the number of people contributing to the analysis from the target population, their person-years contributed, and the number of observed events are given. Expected events are estimated using indirect standardization to the general population. Standardized incidence ratios (SIRs) with 95% confidence intervals (CIs) were estimated. Events with fewer than 5 occurrences were omitted.

|                                | <b>N</b>  | <b>Person-years</b> | <b>Observed events</b> | <b>Expected events</b> | <b>SIR (95% CI)</b> |
|--------------------------------|-----------|---------------------|------------------------|------------------------|---------------------|
| <b>Deep vein thrombosis</b>    |           |                     |                        |                        |                     |
| ChAdOx1 first-dose             | 592,808   | 34,054              | 39                     | 43.9                   | 0.89 (0.65 to 1.22) |
| BNT162b2 first-dose            | 2,030,008 | 100,883             | 184                    | 177                    | 1.04 (0.90 to 1.20) |
| BNT162b2 second-dose           | 1,329,708 | 78,566              | 130                    | 163                    | 0.80 (0.67 to 0.95) |
| <b>Immune thrombocytopenia</b> |           |                     |                        |                        |                     |
| ChAdOx1 first-dose             | 593,128   | 34,073              | 12                     | 24.9                   | 0.48 (0.27 to 0.85) |
| BNT162b2 first-dose            | 2,031,429 | 100,963             | 97                     | 94.5                   | 1.03 (0.84 to 1.25) |
| BNT162b2 second-dose           | 1,330,920 | 78,639              | 61                     | 89.1                   | 0.68 (0.53 to 0.88) |
| <b>Ischemic stroke</b>         |           |                     |                        |                        |                     |
| ChAdOx1 first-dose             | 592,072   | 34,010              | 107                    | 96                     | 1.11 (0.92 to 1.35) |
| BNT162b2 first-dose            | 2,024,431 | 100,557             | 525                    | 532.9                  | 0.99 (0.90 to 1.07) |
| BNT162b2 second-dose           | 1,324,691 | 78,260              | 516                    | 513.1                  | 1.01 (0.92 to 1.10) |

|                                                                       |                      |           |         |       |                     |
|-----------------------------------------------------------------------|----------------------|-----------|---------|-------|---------------------|
| <b>Myocardial infarction</b>                                          |                      |           |         |       |                     |
| ChAdOx1 first-dose                                                    | 592,221              | 34,019    | 72      | 76.5  | 0.94 (0.75 to 1.19) |
| BNT162b2 first-dose                                                   | 2,028,962            | 100,822   | 281     | 268.1 | 1.05 (0.93 to 1.18) |
| BNT162b2 second-dose                                                  | 1,328,821            | 78,509    | 272     | 247.9 | 1.10 (0.97 to 1.24) |
| <b>Myocardial infarction or ischemic stroke</b>                       |                      |           |         |       |                     |
| ChAdOx1 first-dose                                                    | 590,888              | 33,940    | 179     | 169   | 1.06 (0.91 to 1.23) |
| BNT162b2 first-dose                                                   | 2,020,172            | 100,314   | 796     | 784   | 1.02 (0.95 to 1.09) |
| BNT162b2 second-dose                                                  | 1,321,026            | 78,037    | 775     | 744.6 | 1.04 (0.97 to 1.12) |
| <b>Myocardial infarction or ischemic stroke with thrombocytopenia</b> |                      |           |         |       |                     |
| ChAdOx1 first-dose                                                    | 593,223              | 34,078    | 9       | 11.7  | 0.77 (0.40 to 1.48) |
| BNT162b2 first-dose                                                   | 2,032,104            | 101,001   | 53      | 62.2  | 0.85 (0.65 to 1.12) |
| BNT162b2 second-dose                                                  | 1,331,472            | 78,671    | 59      | 60    | 0.98 (0.76 to 1.27) |
| <b>Pulmonary embolism</b>                                             |                      |           |         |       |                     |
| ChAdOx1 first-dose                                                    | ChAdOx1 first-dose   | 592,968   | 34,063  | 24    | 30.8                |
| BNT162b2 first-dose                                                   | BNT162b2 first-dose  | 2,030,489 | 100,909 | 154   | 123.7               |
| BNT162b2 second-dose                                                  | BNT162b2 second-dose | 1,330,172 | 78,593  | 117   | 116.2               |
| <b>Stroke</b>                                                         |                      |           |         |       |                     |

|                                                     |           |         |       |          |                     |
|-----------------------------------------------------|-----------|---------|-------|----------|---------------------|
| ChAdOx1 first-dose                                  | 591,940   | 34,002  | 111   | 112.3    | 0.99 (0.82 to 1.19) |
| BNT162b2 first-dose                                 | 2,023,548 | 100,506 | 583   | 620.7    | 0.94 (0.87 to 1.02) |
| BNT162b2 second-dose                                | 1,323,945 | 78,214  | 588   | 595.9    | 0.99 (0.91 to 1.07) |
| <b>Stroke with thrombocytopenia</b>                 |           |         |       |          |                     |
| BNT162b2 first-dose                                 | 2,032,387 | 101,017 | 39    | 46.5     | 0.84 (0.61 to 1.15) |
| BNT162b2 second-dose                                | 1,331,736 | 78,687  | 41    | 45       | 0.91 (0.67 to 1.24) |
| <b>Thrombocytopenia</b>                             |           |         |       |          |                     |
| ChAdOx1 first-dose                                  | 579,728   | 33,281  | 756   | 589.9    | 1.28 (1.19 to 1.38) |
| BNT162b2 first-dose                                 | 1,964,102 | 97,139  | 3,198 | 2,152.70 | 1.49 (1.43 to 1.54) |
| BNT162b2 second-dose                                | 1,270,019 | 74,987  | 2,760 | 1,968.70 | 1.40 (1.35 to 1.46) |
| <b>Venous thromboembolism</b>                       |           |         |       |          |                     |
| ChAdOx1 first-dose                                  | 592,514   | 34,037  | 60    | 65.6     | 0.91 (0.71 to 1.18) |
| BNT162b2 first-dose                                 | 2,028,012 | 100,768 | 315   | 265.5    | 1.19 (1.06 to 1.32) |
| BNT162b2 second-dose                                | 1,328,020 | 78,463  | 228   | 246.8    | 0.92 (0.81 to 1.05) |
| <b>Venous thromboembolism with thrombocytopenia</b> |           |         |       |          |                     |
| ChAdOx1 first-dose                                  | 593,305   | 34,083  | 8     | 6.2      | 1.28 (0.64 to 2.56) |
| BNT162b2 first-dose                                 | 2,032,684 | 101,034 | 27    | 21.7     | 1.24 (0.85 to 1.81) |

|                      |           |        |    |      |                     |
|----------------------|-----------|--------|----|------|---------------------|
| BNT162b2 second-dose | 1,332,016 | 78,704 | 20 | 20.4 | 0.98 (0.63 to 1.52) |
|----------------------|-----------|--------|----|------|---------------------|
